# Supplementary material for: Development of novel immunotherapy based on nanoparticle co-delivering PLK1 and PD-L1 inhibitors for lung cancer treatment
Source: Research Square preprint supplement (doi:10.21203/rs.3.rs-142908/v1), 2021-01-18
Supplement: Supplementary file 1 [file c01b9d242e1cc9d6c7a60e2d.xlsx]

## Sheet: Legends
Supplementary Table Legends
Supplementary Table 1	Individual body weight measurements of cynomolgus monkeys treated with NP on day 1, and two doses of ARAC-03 on days 8 and 15
Supplementary Table 2	Individual pre- and post-injection hematology parameters of cynomolgus monkeys treated with NP and ARAC-03
Supplementary Table 3	Individual pre- and post-injection coagulation parameters of cynomolgus monkeys treated with NP and ARAC-03
Supplementary Table 4	Individual pre- and post-injection clinical chemistry parameters of cynomolgus monkeys treated with NP and ARAC-03
Supplementary Table 5	Pre- and post-injection cytokine levels in individual cynomolgus monkeys treated with NP and ARAC-03
Supplementary Table 6	Individual dermal observations of cynomolgus monkeys treated with NP and ARAC-03. Dermal observations were evaluated according to the method of Draize
Supplementary Table 7	Individual terminal body and organ weight of cynomolgus monkeys treated with NP and ARAC-03. Animals in treated group were euthanized one week after the final dose. Animal in saline group was euthanized 3 weeks after dosing.
Supplementary Table 8	Macroscopic pathology findings in animals treated with NP and ARAC-03. Animals in treated group were euthanized one week after the final dose. Animal in saline group was euthanized 3 weeks after dosing.
Supplementary Table 9	Histopathology findings in animals treated with NP and ARAC-03. Animals in treated group were euthanized one week after the final dose. Animal in saline group was euthanized 3 weeks after dosing.

## Sheet: Supp_Table_1
Individual body weight measurements of cynomolgus monkeys treated with ARAC-03
Animal number	Time (days)	Weight (kg)
saline	-3	2.7
	1	2.7
	20	3
	21	3
1	-3	3.2
	1	3.1
	8	3.2
	15	3.1
	20	3.1
	21	3.1
2	-4	3.1
	1	3.1
	8	3.1
	15	3.2
	20	3.1
	21	3.1
3	-4	3.2
	1	3.2
	8	3.2
	15	3.2
	20	3.2
	21	3.2

## Sheet: Supp_Table_2
Individual pre- and post-injection hematology parameters of cynomolgus monkeys treated with ARAC-03
Animal number	Time (days)	WBC (10^3/uL)	NEUT (10^3/uL)	LYMPH (10^3/uL)	MONO (10^3/uL)	EOS (10^3/uL)	BASO (10^3/uL)	LUC (10^3/uL)	RBC (10^6/uL)	HGB (g/dL)	HCT (%)	MCV (fL)	MCH (pg)	MCHC (g/dL)	RDW (%)	PLT (10^3/uL)	RETIC (10^9/L)	RBC MORPH	ANISO	POLY	STOM	PLT MORPH	PLATELET CLUMPS	WBC MORPH
saline	-1	10.32	4.68	5.13	0.24	0.11	0.03	0.13	5.23	12.7	42.6	81.5	24.2	29.7	13.5	418	81.5	-	-	-	-	-	-	-
	2	8.57	4.62	3.55	0.19	0.08	0.01	0.11	4.48	10.8	35.9	80.2	24.1	30.1	13.4	380	78.4	-	-	-	-	-	-	-
1	-1	15.28	7.48	7.14	0.53	0.02	0.05	0.06	5.89	13.8	44.9	76.2	23.4	30.7	13.5	346	66.6	-	-	-	-	-	-	-
	2	9.52	5.99	3.33	0.15	0.01	0.01	0.03	5.32	12.3	39.6	74.4	23.2	31.1	13.4	304	43.8	-	-	-	-	-	-	-
	6	11.45	5.73	5.37	0.27	0.01	0.03	0.05	5.32	12.7	40.4	75.9	23.8	31.4	13.8	508	155.9	-	-	-	-	-	-	-
	9	11.56	7.05	4.14	0.3	0	0.03	0.05	5.16	12.2	38.5	74.6	23.7	31.8	15.2	484	89.6	NAF	-	-	-	NAF	-	NAF
	13	9.38	5.51	3.56	0.25	0.01	0.02	0.04	5.21	12.2	40.2	77.2	23.4	30.3	14.6	435	230.4	-	-	-	-	-	-	-
	16	8.99	5.46	3.17	0.28	0	0.02	0.06	4.88	11.3	37.6	77.1	23.3	30.2	14.1	328	126.4	-	-	-	-	-	-	-
	21	10.19	5.76	3.97	0.37	0.01	0.02	0.06	5.26	12.2	41.1	78.1	23.2	29.8	14.3	469	183.2	-	-	-	-	-	-	-
2	-1	10.27	4.82	5.02	0.28	0.07	0.01	0.06	5.3	12.5	42.8	80.6	23.6	29.3	13.1	489	168.1	-	-	-	-	-	-	-
	2	9.96	7.56	2.22	0.12	0.04	0	0.02	4.8	11.1	37.5	78.2	23.2	29.6	13.3	439	165.4	-	-	-	-	-	-	-
	6	10.51	7.07	3.18	0.18	0.05	0.02	0.02	5.04	11.6	40.2	79.8	23.1	28.9	13.4	515	286.8	-	-	-	-	-	-	-
	9	8.24	4.9	3	0.24	0.03	0.02	0.05	4.73	11.4	38.1	80.7	24	29.8	14.3	544	203.3	-	1+	1+	-	NAF	-	NAF
	13	7.78	3.36	3.92	0.31	0.12	0.02	0.05	5.02	11.8	39.2	78	23.6	30.2	13.2	524	334.6	-	-	-	-	-	-	-
	16	4.4	2.46	1.79	0.11	0	0.01	0.03	4.62	10.8	36.8	79.5	23.4	29.4	13.1	401	186.5	-	-	-	-	-	-	-
	21	11.38	7.74	3.29	0.25	0.02	0.02	0.06	4.97	11.7	40	80.5	23.5	29.2	13.5	435	342.9	-	-	-	-	-	-	-
3	-1	30.52	25.54	3.53	1.22	0.1	0.04	0.08	4.46	9.9	34.6	77.6	22.3	28.7	14.2	507	169.3	-	-	-	-	-	-	-
	2	9.99	6.26	3.19	0.25	0.16	0.04	0.09	4.22	9.6	31.8	75.2	22.8	30.3	13.8	404	155.7	-	-	-	-	-	-	-
	6	10.64	6.33	3.63	0.49	0.14	0.01	0.03	4.34	9.4	33.2	76.5	21.7	28.4	14.4	566	240	-	-	-	-	-	-	-
	9	6.63	3.15	2.97	0.32	0.12	0.02	0.05	4.29	9.7	32.6	76.1	22.6	29.7	14.9	508	138.5	-	-	-	1+	-	1+	NAF
	13	7.8	3.33	3.88	0.41	0.1	0.02	0.05	4.57	10.2	35.3	77.2	22.3	28.8	14.4	458	248.5	-	-	-	-	-	-	-
	16	3.54	1.24	2.05	0.18	0.02	0.01	0.04	4.33	9.6	33	76.3	22.1	29	14.1	310	75.4	-	-	-	-	-	-	-
	21	10.57	6.59	3.39	0.45	0.07	0.01	0.06	4.51	10.1	35.1	77.7	22.4	28.8	15.2	407	240.1	-	-	-	-	-	-	-
TABLE EXPLANATION
Abbreviation		Description
WBC		White blood cells
NEUT		Neutrophils
LYMPH		Lymphocytes
MONO		Monocytes
EOS		Eosinophils
LUC		Large unstained cells
RBC		Red blood cells
HGB		Hemoglobin
HCT		Hematocrit
MCV		Mean corpuscular volume
MCH		Mean corpuscular hemoglobin
MCHC		Mean corpuscular hemoglobin concentration
RDW		Red blood cell distribution width
PLT		Platelets
RETIC		Reticulocytes
RBC MORPH		Red blood cell morphology
ANISO		Anisocytosis
POLY		Polychromasia
STOM		Stomatocytes
PLT MORPH		Platelet Morphology
PLATELET CLUMPS		Platelet Clumps
WBC MORPH		White blood cell morphology
NAF		No abnormal findings
1+		Minimal
2+		Mild
3+		Moderate
4+		Marked
-		No findings/Not evaluated

## Sheet: Supp_Table_3
Individual pre- and post-injection coagulation parameters of cynomolgus monkeys treated with ARAC-03
Animal number	Time (days)	PT (sec)	APTT (sec)	FIB (mg/dL)	SAMQ Coagulation
saline	-1	11.4	20.3	253	N
	2	11.3	19.6	278	N
1	-1	12	17.5	260	N
	2	12.5	17	258	N
	6	11.1	16.7	246	N
	9	11.4	16.6	273	N
	13	11.6	18.1	244	N
	16	11.4	17.3	268	N
	21	11.6	16.7	252	N
2	-1	12.3	17.8	236	N
	2	12	16.3	300	H++
	6	11.4	17.5	257	N
	9	12.1	20.7	254	N
	13	11.7	18.2	224	N
	16	12.5	20.5	184	N
	21	12.2	18.1	202	N
3	-1	11.9	16.7	314	N
	2	12	15.6	281	H+
	6	11.5	16.7	295	N
	9	12.1	19.1	324	N
	13	11.9	17.3	256	N
	16	12.5	18.7	235	N
	21	11.1	16.4	220	N
TABLE EXPLANATION
Abbreviation		Description
PT		Prothrombin time
APTT		Activated partial thromboplastin time
FIB		Fibrinogen
SAMQ		Sample quality
N		Normal sample
H+		Hemolyzed sample slight (pale/light red)
H++		Hemolyzed sample moderate (red)
H+++		Hemolysed sample severe (dark red)

## Sheet: Supp_Table_4
Individual pre- and post-injection clinical chemistry parameters of cynomolgus monkeys treated with ARAC-03
Animal number	Time (days)	AST (U/L)	ALT (U/L)	ALP (U/L)	GGT (U/L)	CK (U/L)	TBIL (mg/dL)	UREAN (mg/dL)	CREAT (mg/dL)	GLUC (mg/dL)	CHOL (mg/dL)	TRIG (mg/dL)	TPROT (g/dL)	ALB (g/dL)	GLOB (g/dL)	A/G (ratio)	CA (mg/dL)	PHOS (mg/dL)	NA (mEq/L)	K (mEq/L)	CL (mEq/L)	SAMQ
saline	-1	48	49	272	45	455	0.22	31	0.9	83	163	42	7.2	4.4	2.8	1.6	10.7	4.9	146	4.2	108	N
	2	62	58	259	42	384	0.21	26	0.8	89	130	30	6.6	4.1	2.5	1.6	9.7	4.1	146	4.8	111	N
1	-1	153	126	422	60	687	0.26	31	0.6	91	119	48	6.9	4.4	2.5	1.8	10.4	5.6	143	4.2	107	N
	2	442	252	391	56	2147	0.41	27	0.6	74	104	42	6.7	4.3	2.4	1.8	9.5	5.7	143	4	105	N
	6	47	116	395	59	225	0.32	33	0.7	60	118	52	7.4	4.8	2.6	1.8	10.4	7.5	142	4.8	101	N
	9	173	134	339	48	875	0.4	24	0.6	54	111	36	6.5	4.2	2.3	1.8	9.5	5.7	148	4.7	104	N
	13	47	83	359	54	170	0.35	30	0.6	47	129	55	6.8	4.3	2.5	1.7	9.6	6.8	145	4.8	103	N
	16	110	97	312	59	592	0.34	25	0.6	82	130	38	6.4	4.5	1.9	2.4	9.7	5.5	147	4.4	106	N
	21	41	88	352	57	182	0.34	28	0.6	69	126	55	7.2	4.5	2.7	1.7	10.5	6.8	148	5.7	107	N
2	-1	105	109	668	51	1273	0.19	24	0.5	90	120	50	6.7	4.1	2.6	1.6	10.4	7.8	148	4.6	111	N
	2	338	250	621	43	5362	0.47	25	0.6	69	104	73	6.4	4.1	2.3	1.8	9.2	7.2	146	4	109	H+
	6	51	114	542	43	282	0.3	26	0.5	56	124	62	6.7	4.2	2.5	1.7	10	8	153	5.2	107	N
	9	88	109	540	37	386	0.25	21	0.6	93	112	68	6.4	4	2.4	1.7	9.4	7.7	151	4.3	112	N
	13	35	53	473	40	171	0.2	27	0.5	71	115	53	6.2	3.8	2.4	1.6	9.6	6.5	146	5.1	107	N
	16	145	140	519	37	952	0.29	21	0.5	62	134	52	6.3	4	2.3	1.7	9	6.4	149	3.7	108	N
	21	49	81	453	41	261	0.25	26	0.5	75	133	67	6.4	4	2.4	1.7	9.4	6.2	148	3.7	106	N
3	-1	51	37	309	42	176	0.08	22	0.5	76	104	28	7.3	4.1	3.2	1.3	10.4	4.5	145	3.5	108	N
	2	87	47	292	38	1371	0.18	22	0.3	63	107	47	7	4.1	2.9	1.4	9.5	4.5	144	3.9	110	H+
	6	61	38	301	39	1110	0.14	21	0.5	73	123	36	7.1	4.1	3	1.4	9.8	5.1	147	4.2	107	N
	9	111	66	303	47	182	0.11	19	0.5	83	97	39	6.9	4	2.9	1.4	9.2	4.7	148	3.3	106	N
	13	45	38	321	46	168	0.15	21	0.5	67	124	25	6.9	4.1	2.8	1.5	10	5.1	147	4.8	106	N
	16	71	43	310	44	201	0.16	20	0.5	79	141	43	6.8	4.1	2.7	1.5	9.3	4.8	147	3.3	109	N
	21	61	34	298	39	195	0.17	23	0.4	48	142	35	6.6	4.1	2.5	1.6	9.5	4.2	144	3.6	107	N
TABLE EXPLANATION
Abbreviation		Description
AST		Aspartate aminotransferase
ALT		Alanine aminotransferase
ALP		Alkaline phosphatase
GGT		Gamma glutamyltransferase
CK		creatine kinase
TBIL		Total bilirubin
UREA N		Urea nitrogen
CREAT		Creatinine
GLUC		Glucose
CHOL		Cholesterol
TRIG		Triglycerides
TPROT		Total protein
ALB		Albumin
GLOB		Globulin
A/G		Albumin/Globulin ratio
CA		Calcium
PHOS		Phosphorus
NA		Sodium
K		Potassium
CL		Chloride
SAMQ		Sample quality
N		Normal sample
H+		Hemolyzed sample slight (pale/light red)
H++		Hemolyzed sample moderate (red)
H+++		Hemolysed sample severe (dark red)

## Sheet: Supp_Table_5
Pre- and post-injection cytokine levels in individual cynomolgus monkeys treated with ARAC-03
Animal number	Time (days)	IL-1 beta (pg/mL)	IL-6 (pg/mL)	IFN-gamma (pg/mL)	TNF-alpha (pg/mL)	IFN-alpha (pg/mL)	MCP-1 (pg/mL)
saline	1	<2.83	<7.76	1.37854	0.929853	<0.78	33.5705
	1.25	<2.83	102.446	0.295401	0.929853	<0.78	48.82
	2	<2.83	<7.76	<1.71	1.0995	<0.78	8.83168
	3	<2.83	<7.76	0.207824	1.27265	<0.78	21.9417
1	1	<2.83	<7.76	0.425992	0.760207	<0.78	37.9556
	1.25	<2.83	<7.76	<1.71	0.59546	<0.78	90.9344
	2	<2.83	<7.76	<1.71	0.59546	<0.78	23.5771
	3	<2.83	<7.76	<1.71	0.59546	0.0262551	32.894
	8	<2.83	<7.76	<1.71	0.430712	0.0273015	13.9261
	8.25	<2.83	<7.76	<1.71	0.59546	0.0692815	40.0584
	9	<2.83	<7.76	<1.71	0.430712	0.0976165	13.9261
	10	<2.83	<7.76	<1.71	0.59546	0.0133577	23.1834
	15	<2.83	<7.76	<1.71	0.59546	0.0685339	5.24117
	15.25	<2.83	<7.76	<1.71	0.59546	<0.78	11.6319
	16	<2.83	<7.76	<1.71	0.677087	0.0335104	3.94882
	17	<2.83	<7.76	<1.71	0.760207	0.0563841	5.24117
2	1	<2.83	<7.76	<1.71	0.59546	<0.78	74.4448
	1.25	<2.83	<7.76	<1.71	1.0995	<0.78	110.006
	2	<2.83	<7.76	0.859861	0.929853	<0.78	53.3345
	3	<2.83	<7.76	<1.71	0.929853	<0.78	70.0952
	8	<2.83	<7.76	<1.71	0.760207	<0.78	50.0731
	8.25	<2.83	<7.76	<1.71	0.929853	1.8561	354.025
	9	<2.83	<7.76	<1.71	0.929853	<0.78	61.2128
	10	<2.83	<7.76	<1.71	0.760207	<0.78	34.3539
	15	<2.83	<7.76	<1.71	1.0995	<0.78	14.8488
	15.25	0.236966	<7.76	0.599774	1.79985	127.574	1122.73
	16	<2.83	<7.76	<1.71	0.59546	<0.78	28.9145
	17	<2.83	<7.76	<1.71	0.760207	<0.78	30.5132
3	1	<2.83	<7.76	<1.71	0.929853	<0.78	18.4905
	1.25	<2.83	<7.76	<1.71	0.760207	<0.78	28.1525
	2	<2.83	<7.76	<1.71	0.59546	<0.78	23.1746
	3	<2.83	<7.76	<1.71	0.929853	<0.78	31.277
	8	<2.83	<7.76	<1.71	0.59546	<0.78	27.307
	8.25	<2.83	<7.76	<1.71	0.929853	0.814622	92.4215
	9	<2.83	<7.76	<1.71	0.760207	<0.78	12.922
	10	<2.83	<7.76	<1.71	0.929853	<0.78	24.8121
	15	<2.83	<7.76	<1.71	0.760207	<0.78	10.338
	15.25	<2.83	<7.76	0.425992	0.929853	35.2807	143.453
	16	<2.83	<7.76	<1.71	0.59546	<0.78	15.8076
	17	<2.83	<7.76	<1.71	0.760207	<0.78	7.12112
TABLE EXPLANATION
Abbreviation		Description
IL-1 beta		Interleukin 1 beta
IL-6		Interleukin 6
IFN-gamma		Interferon gamma
TNF-alpha		Tumor necrosis factor alpha
IFN-alpha		Interferon gamma
MCP-1		Monocyte chemoattractant protein 1

## Sheet: Supp_Table_6
Individual dermal observations of cynomolgus monkeys treated with three doses ARAC-03. Dermal observations were evaluated according to the method of Draize (Draize, 1965)
Dose	Animal number	Edema grade (Draize score 0-4)			Erythema (grade 0-4)
		Day(s) Relative to Dose Start			Day(s) Relative to Dose Start
		1	2	3	1	2	3
Saline	Saline	0	-	-	1	-	-
5.6 mg/kg NP	1	0	-	-	1	-	-
	2	1	0	0	2	0	0
	3	0	0	0	1	0	0
6.0 mg/kg ARAC-03	1	-	-	-	-	-	-
	2	0	-	-	1	-	-
	3	-	-	-	-	-	-
18.0 mg/kg ARAC-03	1	-	-	-	-	-	-
	2	0	0	-	1	1	-
	3	0	0	-	1	2	-
TABLE EXPLANATION
Abbreviation	Description
-	No findings/Not evaluated
ERYTHEMA AND EDEMA OBSERVATIONS
OBSERVATION	DEFINITION								CODE
Erythema - Grade 0	No erythema								0
Erythema - Grade 1	Very slight erythema (barely perceptible)								1
Erythema - Grade 2	Well-defined erythema								2
Erythema - Grade 3	Moderate to severe erythema								3
Erythema - Grade 4	Severe erythema (beet redness) to slight eschar formation (injuries in depth)								4
Maximized Grade 4	Notable dermal lesions								M-4
Edema - Grade 0	No edema								0
Edema - Grade 1	Very slight edema (barely perceptible)								1
Edema - Grade 2	Slight edema (edges of area well defined by definite raising)								2
Edema - Grade 3	Moderate edema (raised approximately 1 millimeter)								3
Edema - Grade 4	Severe edema (raised more than 1 millimeter and extends beyond the area of exposure)								4

## Sheet: Supp_Table_7
Individual terminal body and organ weight of cynomolgus monkeys treated with NP and ARAC-03. Animals in treated group were euthanized one week after the final dose. Animal in saline group was euthanized 3 weeks after dosing.
Animal number	Terminal Body Wt (kg)	Brain (g)	Adrenal Gland (g)	Pituitary Gland (g)	Thyroid/Parathyroid (g)	Heart (g)	Kidney (g)	Liver/Gallbladder (g)	Ovary (g)	Spleen (g)	Thymus (g)	Uterus/Cervix (g)
Saline	3	63.06	0.49	0.03	0.21	10.46	12.46	60.58	0.2	2.71	1.56	2.84
1	3.1	63.79	0.5	0.04	0.21	11.21	13.47	64.27	0.23	3.23	1.89	2.26
2	3.1	61.28	0.52	0.04	0.23	12.15	14.19	83.04	0.28	4.5	1.51	4.91
3	3.2	66.24	0.48	0.06	0.37	13.5	13.62	62.13	0.28	5.29	2.31	4.97

## Sheet: Supp_Table_8
Macroscopic pathology findings in animals treated with NP and ARAC-03. Animals in treated group were euthanized one week after the final dose. Animal in saline group was euthanized 3 weeks after dosing.
Examined Location	NP, ARAC-03 Treated Group				Saline Group
	Number of Animals			note on observation	Number of Animals			note on observation
	Examined	No Visible Lesions	Observation		Examined	No Visible Lesions	Observation
Artery, aorta	3	3	0	-	1	1	0	-
Bone marrow, sternum	3	3	0	-	1	1	0	-
Bone, femur	3	3	0	-	1	1	0	-
Bone, sternum	3	3	0	-	1	1	0	-
Brain	3	3	0	-	1	1	0	-
Cervix	3	3	0	-	1	1	0	-
Esophagus	3	3	0	-	1	1	0	-
Eye	3	3	0	-	1	1	0	-
Gallbladder	3	3	0	-	1	1	0	-
Galt	3	3	0	-	1	1	0	-
Gland, adrenal	3	3	0	-	1	1	0	-
Gland, lacrimal	3	3	0	-	1	1	0	-
Gland, mammary	3	3	0	-	1	1	0	-
Gland, parathyroid	3	3	0	-	1	1	0	-
Gland, pituitary	3	3	0	-	1	1	0	-
Gland, salivary, parotid	3	3	0	-	1	1	0	-
Gland, salivary, sublingual	3	3	0	-	1	1	0	-
Gland, thyroid	3	3	0	-	1	1	0	-
Heart	3	3	0	-	1	1	0	-
Joint, femorotibial	3	3	0	-	1	1	0	-
Kidney	3	3	0	-	1	1	0	-
Large intestine, cecum	3	3	0	-	1	1	0	-
Large intestine, colon	3	3	0	-	1	1	0	-
Large intestine, rectum	3	3	0	-	1	1	0	-
Liver	3	3	0	-	1	1	0	-
Lung	3	3	0	-	1	1	0	-
Lymph node, inguinal	3	3	0	-	1	1	0	-
Lymph node, mandibular	3	3	0	-	1	1	0	-
Lymph node, mesenteric	3	3	0	-	1	1	0	-
Muscle, quadriceps	3	3	0	-	1	1	0	-
Nerve, optic	3	3	0	-	1	1	0	-
Nerve, sciatic	3	3	0	-	1	1	0	-
Nerve, tibial	3	3	0	-	1	1	0	-
Ovary	3	2	1	Cyst, clear; fluid	1	1	0	-
Oviduct	3	3	0	-	1	1	0	-
Pancreas	3	3	0	-	1	1	0	-
Site, infusion, saphenous, right	3	3	0	-	1	1	0	-
Skin	3	3	0	-	1	1	0	-
Small intestine, duodenum	3	3	0	-	1	1	0	-
Small intestine, ileum	3	3	0	-	1	1	0	-
Small intestine, jejunum	3	2	1	Intussusception	1	1	0	-
Spinal cord, cervical	3	3	0	-	1	1	0	-
Spinal cord, lumbar	3	3	0	-	1	1	0	-
Spinal cord, thoracic	3	3	0	-	1	1	0	-
Spleen	3	3	0	-	1	1	0	-
Stomach	3	3	0	-	1	1	0	-
Thymus	3	3	0	-	1	1	0	-
Tongue	3	3	0	-	1	1	0	-
Trachea	3	3	0	-	1	1	0	-
Ureter	3	3	0	-	1	1	0	-
Urinary bladder	3	3	0	-	1	1	0	-
Uterus	3	3	0	-	1	1	0	-
Vagina	3	3	0	-	1	1	0	-
Gland, salivary, submandibular	3	3	0	-	1	1	0	-

## Sheet: Supp_Table_9
Histopathology findings in animals treated with NP and ARAC-03. Animals in treated group were euthanized one week after the final dose. Animal in saline group was euthanized 3 weeks after dosing.
Treatment group	Examined location	Number of Animals			observation
		Examined	No Visible Lesions	Observation
treated	Brain	3	3	0	-
	Heart	3	3	0	-
	Kidney	3	2	1	minimal mononuclear cell infiltration
	Liver	3	2	1	minimal mononuclear cell infiltration
	Lung	3	3	0	-
	Ovary	1	0	1	Cyst
	Small intestine, jejunum	1	0	1	Anomaly
	Spleen	3	3	0	-
saline	Brain	1	1	0	-
	Heart	1	0	1	minimal focal mononuclear cell infiltration
	Kidney	1	1	0	-
	Liver	1	1	0	-
	Lung	1	1	0	-
	Spleen	1	1	0	-
